# Supplementary material for: Multi-scale reactive extrusion modelling approaches to design polymer synthesis, modification and mechanical recycling
Source: Royal Society of Chemistry journal article supplement (doi:10.1039/d1re00556a), 2022-01-01
Supplement: d1re00556a1.pdf [file d1re00556a1.pdf]

## **Supporting Information for “Multi-scale reactive extrusion modeling approaches to design polymer synthesis, modification and mechanical recycling”**

Kyann De Smit,<sup>1</sup> Tom Wieme,<sup>1,2</sup> Yoshi W. Marien,<sup>1</sup> Paul H.M. Van Steenberge,<sup>1</sup>  
Dagmar R. D’hooge<sup>1,3\*</sup>, Mariya Edeleva<sup>1\*</sup>

<sup>1</sup> Laboratory for Chemical Technology (LCT), Ghent University, Technologiepark 125, 9052 Ghent, Belgium.

<sup>2</sup> Centre for Polymer and Material Technologies (CPMT), Ghent University, Technologiepark 130, 9052 Ghent, Belgium

<sup>3</sup> Centre for Textile Science and Engineering (CTSE), Ghent University, Technologiepark 70a, 9052 Ghent, Belgium.

Corresponding author: [dagmar.dhooge@ugent.be](mailto:dagmar.dhooge@ugent.be), [mariya.edeleva@ugent.be](mailto:mariya.edeleva@ugent.be)

**Table S1: Parameters for Case study 3. Conventional epoxy-amine ones from De Keer *et al.*<sup>1</sup> Other parameters this work, which only considers intrinsic simulations results.**

|                                                             | Equation                                                    | A                 | $E_a$ (kJ/mol) |
|-------------------------------------------------------------|-------------------------------------------------------------|-------------------|----------------|
| <b>Primary amine-acetoacetate - intermolecular</b>          | $-PA + -AA \xrightarrow{k_{VU,inter}} -VU + H_2O$           | $2.51 \cdot 10^3$ | 43.5           |
| <b>Primary amine curing – intermolecular</b>                | $-PA + -EP \xrightarrow{k_{PA,inter}} -SA + -OH$            | $2.51 \cdot 10^3$ | 60             |
| <b>Primary amine curing – intermolecular</b>                | $-PA + -EP + -OH \xrightarrow{k_{PA,inter,cat}} -SA + -OH$  | $1.26 \cdot 10^3$ | 60             |
| <b>Primary amine curing – intramolecular</b>                | $-PA + -EP + -OH \xrightarrow{k_{PA,intra,cat}} -SA + -OH$  | $2.51 \cdot 10^3$ | 60             |
| <b>Secondary amine curing – intermolecular</b>              | $-SA + -EP + -OH \xrightarrow{k_{SA,inter,cat}} -TA + -OH$  | $3.98 \cdot 10^3$ | 60             |
| <b>Secondary amine curing – intramolecular</b>              | $-SA + -EP + -OH \xrightarrow{k_{SA,intra,cat}} -TA + -OH$  | $3.98 \cdot 10^3$ | 60             |
| <b>Vinylogous Urethane - Primary amine – intermolecular</b> | $-VU_1 + -PA_1 \xrightarrow{k_{VU-PA,inter}} -VU_2 + -PA_2$ | $2.51 \cdot 10^3$ | 60             |
| <b>Vinylogous Urethane - Primary amine – intramolecular</b> | $-VU_1 + -PA_1 \xrightarrow{k_{VU-PA,intra}} -VU_2 + -PA_2$ | $2.51 \cdot 10^3$ | 60             |
| <b>Initial number of molecules so monomers</b>              |                                                             |                   |                |
| <b>Amine</b>                                                | 3000                                                        |                   |                |
| <b>Epoxy</b>                                                | 2100                                                        |                   |                |
| <b>Acetoacetate</b>                                         | 1900                                                        |                   |                |

**Table S2: Parameters formally used in Case study 4 to illustrate the retardation caused by acrylate units during unzipping of an MMA-rich copolymer. A: MMA; B: acrylate unit. Note that  $k_{\beta 4}$  is kinetically insignificant in this work as due to the low considered amount of B units in the copolymer (initially 5%) the probability for having both a terminal and penultimate B unit is very small. Hence, for simplicity  $k_{\beta 4}$  is taken equal to  $k_{\beta 2}$ .**

| Reaction                                                 | Rate coefficient (in s <sup>-1</sup> ) |
|----------------------------------------------------------|----------------------------------------|
| $R_{i,AA} \xrightarrow{k_{\beta 1}} R_{i-1,A(B)A} + M_A$ | $10^5$                                 |
| $R_{i,BA} \xrightarrow{k_{\beta 2}} R_{i-1,A(B)B} + M_A$ | $10^2$                                 |
| $R_{i,AB} \xrightarrow{k_{\beta 3}} R_{i-1,A(B)A} + M_B$ | $10^8$                                 |
| $R_{i,BB} \xrightarrow{k_{\beta 1}} R_{i-1,A(B)B} + M_B$ | $10^2$                                 |

1. De Keer, L.; Kilic, K. I.; Van Steenberge, P. H.; Daelemans, L.; Kodura, D.; Frisch, H.; De Clerck, K.; Reyniers, M.-F.; Barner-Kowollik, C.; Dauskardt, R. H., Computational prediction of the molecular configuration of three-dimensional network polymers. *Nature Materials* **2021**, 20, (10), 1422-1430.
